# Supplementary material
Source: PubMed Central journal article supplement (PMC2996914)
Supplement: supp_fj.10-159517_10-159517SuppData.pdf [file supp_fj.10-159517_10-159517SuppData.pdf]

**Supplement. Table 1.** *TaqMan Primers and Probes*

| Gene       | Type    | Sequence (5'-3')                          |
|------------|---------|-------------------------------------------|
| SREBP1     | Forward | CCG TGG GCT GAG GAA GGA                   |
|            | Reverse | TGT GTA CTT GCC CAT GGC A                 |
|            | Probe   | f CGT GCC AGT GCC CGG GAT GC q            |
| PPARa      | Forward | ATG CCT TAG AAC TGG ATG ACA               |
|            | Reverse | GCA ACT TCT CAA TGT AGC CTA               |
|            | Probe   | f CCT GTT TGT GGC TGC TAT AAT TTG CTG TGq |
| PPARg1     | Forward | CTG ACG GGT TCT CGG TTG A                 |
|            | Reverse | ATC AGT GGT TCA CCG CTT CT                |
|            | Probe   | f CTG AGA AGT CAC GTT CTG ACA GGA Cq      |
| CD36       | Forward | GCC AAG CTA TTG CGA CAT GA                |
|            | Reverse | AGA ATC TCA ATG TCC GAG ACT               |
|            | Probe   | f CAC AGA CGC AGC CTC CTT TCC ACC q       |
| VLDLR      | Forward | CCA CAG CAG TAT CAG AAG TC                |
|            | Reverse | GCC ATC ACT AAG AGC AAG AG                |
|            | Probe   | f CGT CAG CTG CCT GGG CCA TCC T q         |
| LDLR       | Forward | CAG ACT GCA AGG ACA AGT CA                |
|            | Reverse | GAG CCA TCT GCA CAC TGG AA                |
|            | Probe   | f TGG CCA CCT GCC GAC CTG ATG q           |
| Glut4      | Forward | GTC AAT ACG GTC TTC ACG TT                |
|            | Reverse | AGA GCC ACG GTC ATC AAG AT                |
|            | Probe   | f ATG CCG GCC AGG CCC AAC AG q            |
| Glu1       | Forward | TGA CCA TCG CCC TGG CCT T                 |
|            | Reverse | AGG CCA CAA AGC CAA AGA TG                |
|            | Probe   | f CTG CCT TGG ATG TCC TAT CTG AGC A q     |
| DGAT1      | Forward | CTC CAT CAT GTT CCT CAA GCT               |
|            | Reverse | CTT CCC TGT AGA GAC AGC TT                |
|            | Probe   | f TCC TAC CGG GAT GTC AAC CTG TGG q       |
| LPL        | Forward | AGT GTT TGT GAA ATG CCA TGA CA            |
|            | Reverse | CGG ATG CTT TCT TCT CTT GTT TG            |
|            | Probe   | fCTCTGA AGA AGT CTG GCTGAC ACT GGA CAAq   |
| Hep Lipase | Forward | GCC AGG ATG CCA GAA GAA TA                |
|            | Reverse | ACA GGC AGC AGC AAA GTT TCG AG            |
|            | Probe   | f CTT CCC AGA TCC CGT CGA TGT CAA C q     |
| FAS        | Forward | AGC TGT CCC CTG ATG CCA                   |
|            | Reverse | GAG AAC TCC ATG CCG AGC A                 |
|            | Probe   | f TCC AGG TAA ATG GGC CAG CCG AG q        |
| Hum ApoE   | Forward | GCT GTC CAA GGA GCT GCA                   |
|            | Reverse | TAC TGC ACC AGG CGG CC                    |
|            | Probe   | f CGT CCT CCA TGT CCG CGC CCA q           |
| IRS1       | Forward | CAG TAG CAG CAT CAG CGC A                 |
|            | Reverse | GGC ATG AGT ATG GTG CCC                   |
|            | Probe   | f ATG GCT TCC CAT AGC TGC TCC CAG A q     |
| IRS2       | Forward | ATG AAC CTG GAC TTC AGT TCT               |

|                |         |                                        |
|----------------|---------|----------------------------------------|
|                | Reverse | ATC CAT GGA GCC TAC TGT GT             |
|                | Probe   | f TCC CCC AAG CCT AGC CTA GCA CCC GC q |
| $\beta$ -Actin | Forward | CTG CCT GAC GGC CAG GTC                |
|                | Reverse | CAA GAA GGA AGG CTG GAA AAG A          |
|                | Probe   | f CAC TAT TGG CAA CGA GCG GTT CCG q    |

---

f, Reporter dye1 (FAM:6-carboxyfluorescein); q, Quencher dye (TAMRA: 6-carboxytetramethyl-rhodamine)

**Supplement. Table 2.** Effects of low fat diet supplemented with ROSI on tissues weight and plasma biochemistry.

|                              | E3          |             | E4          |             | Two-way ANOVA |        |           |
|------------------------------|-------------|-------------|-------------|-------------|---------------|--------|-----------|
|                              | 0           | 1.5 mg/kg   | 0           | 1.5 mg/kg   | GENE          | ROSI   | GENE*ROSI |
| Body weight (g)              | 29.2 ± 0.2  | 29.4 ± 0.4  | 28.9 ± 0.4  | 28.7 ± 0.4  | ns            | ns     | ns        |
| Visc. fat / BW ratio (%)     | 0.80 ± 0.05 | 1.13 ± 0.03 | 1.00 ± 0.06 | 1.25 ± 0.06 | 0.01          | <0.001 | ns        |
| Subc. fat / BW ratio (%)     | 0.60 ± 0.02 | 1.03 ± 0.04 | 0.80 ± 0.04 | 1.25 ± 0.08 | 0.02          | <0.001 | ns        |
| Liver Triglyc./ prot. (mg/g) | 56 ± 6      | 107 ± 14    | 47 ± 8      | 104 ± 12    | ns            | <0.001 | ns        |
| Liver ROS (F.U.)             | 1.6 ± 0.3   | 1.9 ± 0.2   | 1.6 ± 0.2   | 1.9 ± 0.1   | ns            | ns     | ns        |
| Triglycerides (mg/dl)        | 45 ± 6      | 42 ± 3      | 42 ± 1      | 24 ± 6      | ns            | ns     | ns        |
| Cholesterol (mg/dl)          | 39 ± 3      | 28 ± 1      | 40 ± 1      | 28 ± 1      | ns            | <0.001 | ns        |
| Glucose (mg/dl)              | 136 ± 20    | 144 ± 13    | 149 ± 8     | 173 ± 18    | ns            | ns     | ns        |
| Adiponectin (mg/L)           | 20 ± 3      | 39 ± 2      | 23 ± 3      | 48 ± 6      | ns            | <0.001 | ns        |
| ApoE (A.U.)                  | 0.22 ± 0.02 | 0.20 ± 0.01 | 0.28 ± 0.03 | 0.25 ± 0.01 | 0.02          | ns     | ns        |

Supplemental figures

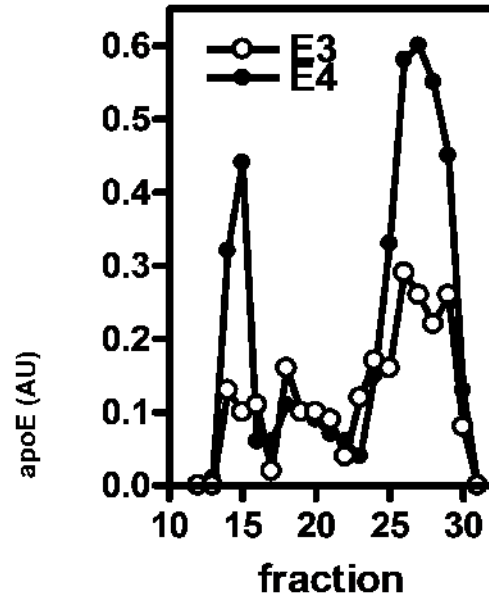

FIG. 1.

Plasma distribution of apolipoprotein E in APOE3 (○) and APOE4 (●) mice fed WD over 12 weeks followed an extra 4 weeks of with 1.5 mg/kg of body weight/day ROSI. Postprandial lipoproteins of mice fed WD were fractionated by FPLC and results are presented as arbitrary units of apoE in each fraction. Fractions 11–17 corresponded to VLDL, 17–25 to LDL and VLDL remnants and 25– 31 to HDL

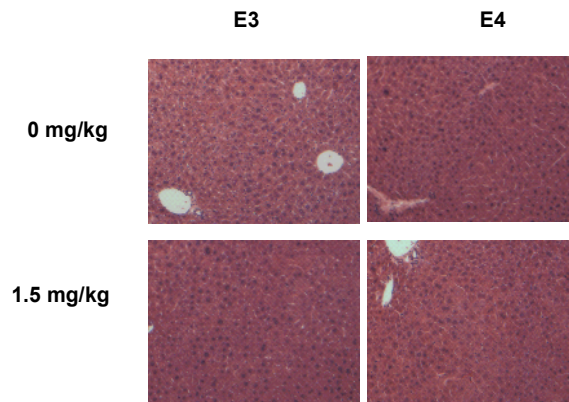

FIG. 2. Effects of low fat diet supplemented with 1.5 mg/kg of body weight/day ROSI on APOE3 and APOE4 mice. Liver histology Cross sectional areas of adipocytes from epididymal adipose tissues of APOE3 or APOE4 mice fed low fat diet without (white bars) or with 1.5 mg/kg of body weight/day (grey bars)

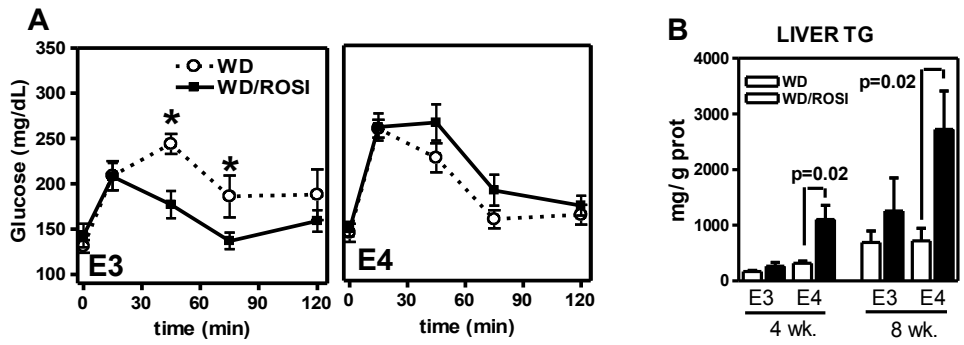

FIG. 3 Effects of feeding 8 weeks of a Western-type diet without (WD) or with 1.5 mg/kg of body weight/day rosiglitazone (WD/ROSI) on (A) glucose tolerance. (B) Liver triglycerides after 4 or 8 weeks of WD without (WD) or with 1.5 mg/kg of body weight/day rosiglitazone (WD/ROSI).

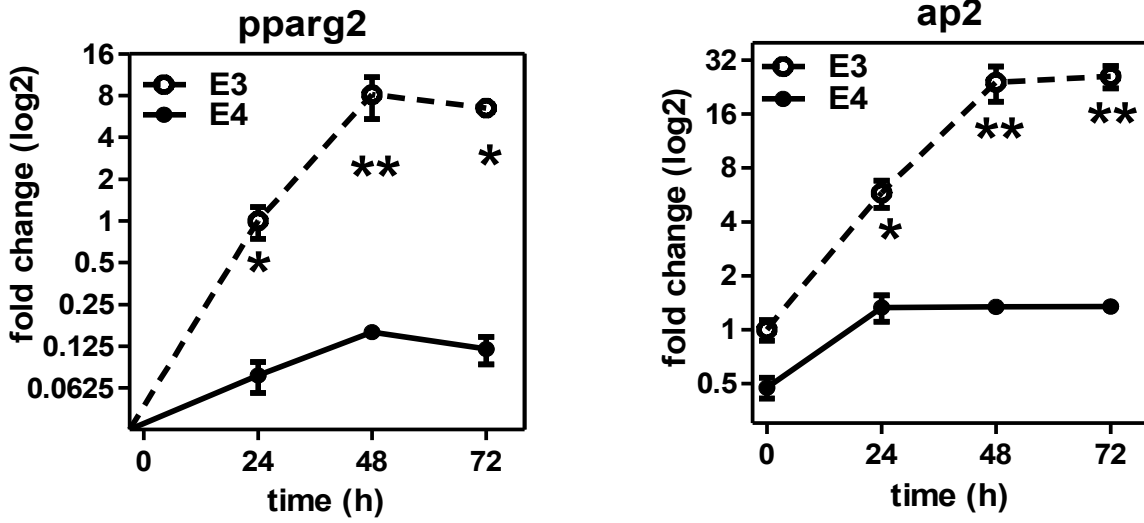

Figure 4. Adipocyte differentiation *in vitro*. Preadipocytes isolated from perigonadal tissues were differentiated into adipocytes using commercial differentiation cocktail containing a PPAR $\gamma$  agonist. Induction of selected genes is shown during the 72 hours post-differentiation in APOE3 ( $\circ$ ) or APOE4 ( $\bullet$ ) preadipocytes.
